# Supplementary material
Source: HighWire-hosted journal article supplement (https://erj.ersjournals.com/content/52/6/1801444)
Supplement: inline-supplementary-material-1 [file inline-supplementary-material-1.pdf]

## **The Wessex Severe Asthma Cohort Study**

The Wessex Severe Asthma Cohort (WSAC) is an observational cross-sectional study providing detailed characterisation of severe asthma patients recruited from specialist severe asthma clinics at Portsmouth and Southampton Hospitals between April 2009 and January 2014. In addition to the severe asthma group two comparator groups including a healthy control group and a group with stable mild/moderate asthma were recruited and underwent the same detailed characterisation.

### **1.1 Study Participants**

The eligibility criteria were designed to create an inclusive cohort representative of the patients seen in the specialist severe asthma clinics at the two sites. Participants were aged between 18 and 80 years with no restrictions according to gender, race or smoking status.

Eligibility for the severe asthma group required:

- A diagnosis of asthma confirmed by an asthma specialist in accordance with the BTS/SIGN guidelines 2009 with alternative causes for symptoms excluded and treatment for co-morbidities optimised and had been under follow up with a specialist for at least 6 months at the time of enrolment as recommended in the ERS severe asthma guidelines 1999.
- Features of poor disease control with persistent symptoms requiring regular short acting beta-agonist rescue medication and at least one severe exacerbation in the preceding year despite high-intensity maintenance asthma treatment.

Severe exacerbations defined as a worsening of asthma requiring systemic corticosteroids, or an increase in maintenance dose of systemic corticosteroids, for at least three days[1].

High-intensity maintenance asthma treatment included patients taking  $\geq 1000\mu\text{g/day}$  BDP equivalent inhaled corticosteroid (or maintenance systemic corticosteroids) and a long acting beta-2 agonist or alternative controller medications (steps 4 and 5 of the BTS/SIGN Asthma Guideline treatment algorithm 2009[2]).

Participants eligible for the mild-moderate asthma group were taking  $\leq 800\mu\text{g/day}$  BDP equivalent inhaled corticosteroid (steps 1-3 of the BTS/SIGN Asthma Guideline treatment algorithm 2009 ) and had well controlled disease with no disease exacerbations requiring systemic corticosteroids over the preceding year. Participants eligible for the healthy control group had no current or historical symptoms suggestive of asthma and normal lung function. Patients with significant co-morbid disease other than asthma and those unable to comply with investigational procedures were excluded.

Potential participants with severe asthma who fulfilled the trial eligibility criteria were identified in the specialist severe asthma clinics and provided with a Patient Information Sheet. Those wishing to take part returned for a specific study appointment. Adverts and existing databases were used to identify participants for the healthy and milder asthma groups.

### **1.2 Data Collection**

All participants underwent a detailed characterisation protocol (see Table 5) including a detailed asthma and medical history; disease control, quality of life, and comorbidity questionnaires; pulmonary physiology; allergy testing; exhaled nitric oxide testing; HRCT imaging of the chest; sputum induction, nasal lavage, blood, and urine samples for biological measures of inflammation and genomic testing. The characterisation procedures used are all standard, and established guidelines were followed. Study-specific Standard Operating Procedures (SOPs) were created for sputum induction, nasal lavage and sample processing to ensure consistency between the two recruiting sites.

All data was entered onto a paper Case Report Form (CRF) at the time of review and uploaded onto the secure WSAC database after completion of all study procedures.

### **1.3 Confidentiality and Ethics**

The study was conducted in accordance with the International Conference on Harmonisation Guidance for Good Clinical Practice and the clinical principles outline in the Declaration of Helsinki. Independent ethics committee approval was obtained (MREC No. 09/H0502/37), and all participants provided written informed consent. Unique identification codes were used to identify participants within the trial database as well as their biological samples. All participant data has been stored securely and is only accessible to study staff and authorised personnel. The study is funded by the UK Medical Research Council Patient Research Cohorts Initiative. The study was sponsored by University Hospital Southampton NHS Foundation Trust and was adopted onto the UKCRN Portfolio (<http://public.ukcrn.org.uk/Search/StudyDetail.aspx?StudyID=7547>).

## 2. Recruitment

491 participants were recruited and underwent the detailed characterisation protocol between April 2009 and January 2014. Details of recruitment are shown in Figure 1.

**Figure 1: Wessex Severe Asthma Cohort Study Recruitment**

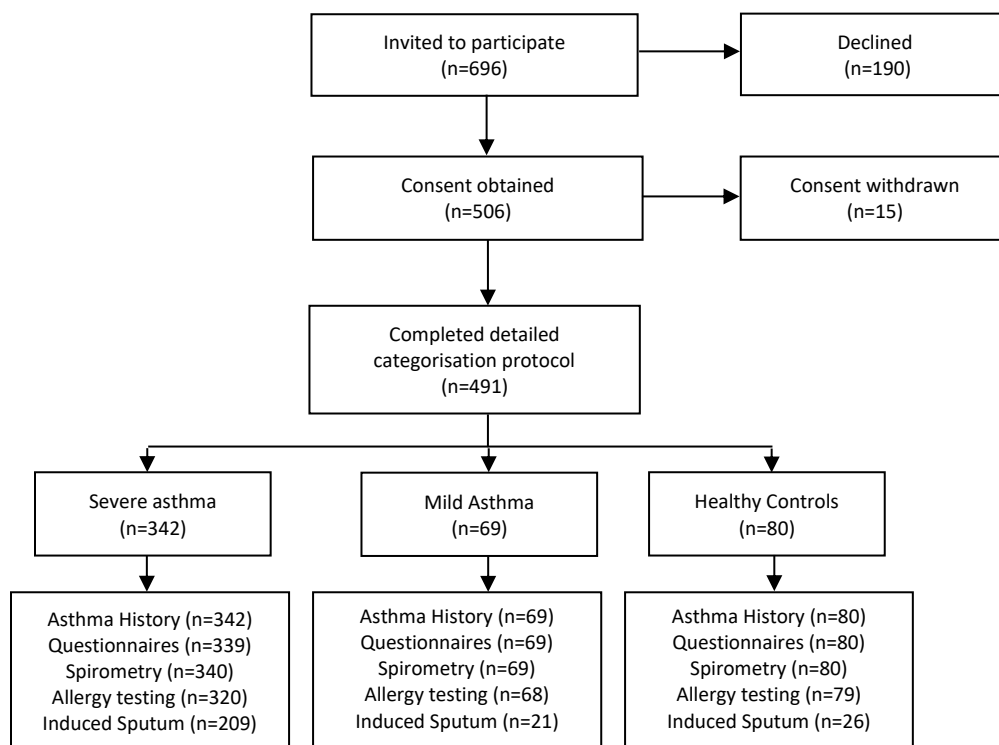

Within the severe asthma group induced sputum was obtained from 61.1% of participants but in the milder and control cohorts this was lower at 30.4% and 32.5% respectively. This reflected participants being either unable to produce sputum (particularly in the healthy control population) or not being willing to have this procedure performed. However, sputum samples were obtained in a similar number of participants when compared to other published severe asthma cohorts (see Table 1).

**Table 1: Sputum Induction in Severe Asthma Cohorts/Registries**

|                                 | WSAC | SARP[3] | UBIOPRED[4] | BSAR[5] | BIOAIR[6] |
|---------------------------------|------|---------|-------------|---------|-----------|
| Cohort size (n)                 | 342  | 204     | 421         | 350     | 93        |
| Successful sputum induction (%) | 61.1 | 60.7    | 43.0        | 32.2    | 24.6      |

### **3. Study Procedures**

#### **3.1 Spirometry**

Spirometry was performed using a portable spirometer (Vitalograph Alpha Touch®, Vitalograph Ltd, Buckingham, UK) in accordance with ATS/ERS guidelines[7]. The best forced expiratory volume in 1 second (FEV<sub>1</sub>) and forced vital capacity (FVC) values, from three acceptable manoeuvres, were recorded and analysed according to the European Coal and Steel Community (ECSC) 1993 predicted values. Bronchodilator reversibility testing was performed 15 minutes after the administration of 2.5mg nebulised salbutamol with significant reversibility defined as a 200ml and 12% increase in FEV<sub>1</sub>.

#### **3.2 Single Breath Gas Transfer**

Single Breath Gas Transfer measures were performed in accordance with ATS/ERS guidelines. Mean results of the transfer factor for carbon monoxide (TL<sub>CO</sub>) and the transfer coefficient of the lung for carbon monoxide K<sub>CO</sub> (not corrected for haemoglobin) were reported as a percent predicted using equations recommended by the ATS/ERS taskforce[8].

#### **3.3 Impulse Oscillometry (IOS)**

Impulse oscillometry (CareFusion MasterScreen™ IOS) was measured on a sub population of the cohort. A minimum of three tests of 30 seconds tidal breathing at Functional Residual capacity (FRC) were performed as per ERS taskforce recommendations[9]. Impulse oscillometry was performed before and after 2.5mg nebulised salbutamol. Mean oscillometric parameters were recorded and included but not limited to Z5, R5, R20, X5, R5-R20.

#### **3.4 Exhaled Nitric Oxide (FeNO)**

The fraction of exhaled nitric oxide (FeNO) was measured at the standard flow rate of 50ml/sec (NIOX MINO®, Aerocrine AB®, Solna, Sweden) in accordance with ATS/ERS guidelines[10]. FeNO was measured prior to other lung function tests and at least 2-hours after eating or drinking with the mean of at least two reproducible values recorded as parts per billion (ppb). In a sub population, FeNO was measured at higher flow rates of 100 and 200ml/sec (NIOX Flex®, Aerocrine AB®, Solna, Sweden) to calculate alveolar NO (CANO) and bronchial NO flux (JawNO) using the linear NO model.

#### **3.5 Nasal Nitric Oxide (nNO)**

Nasal nitric oxide measures (NIOX Flex®, Aerocrine AB®, Solna, Sweden) were performed in a sub population. A minimum of two reproducible values (ppb) were obtained from each nostril using the breath hold manoeuvre and the mean value from each nostril was reported.

### **4. Sample collection**

All biological samples were obtained under consistent conditions with standardised processing procedures followed by the cohort characterisation team.

#### **4.1 Sputum Induction**

Sputum was induced using a DeVilbiss® Ultraneb (DeVilbiss, NY, USA) following a standardised protocol based on the methods described by ten Brinke et al[11]. Patients were bronchodilated with short acting beta-agonist (SABA) medication prior to sputum induction and lung function (FEV<sub>1</sub>) was measured after each 5 minute nebulisation (4.5% saline) to check if a 20% drop from post bronchodilator FEV<sub>1</sub> had been reached at which point the induction would be stopped. For severe asthmatics at risk of bronchoconstriction, clinical judgement determined if nebulisation protocol should begin with 0.9% saline followed by 3% and finally 4.5% if tolerated. Lung function (FEV<sub>1</sub>) was measured after each 5 minute nebulisation and after 2 minutes of nebulisation if the subject's FEV<sub>1</sub><1.5L. After a maximum of 20 minutes total nebulisation time for stable subjects, 15 minutes for at risk subjects or when an adequate sample was obtained, the procedure was stopped. Samples were stored on ice

during collection and transport to the laboratory for processing. Sputum samples were processed as soon as possible and within 2 hours of expectoration.

#### 4.2 Nasal Lavage

Subjects were seated in a forward-flexed position and for each nostril, 2.5ml of 0.9% saline (warmed to 37°C) was passed slowly into the nasal cavity using a 10ml syringe and then left to dwell for 10 seconds. The saline was withdrawn into the syringe and collected in a sterile tube kept cool on ice. This process was repeated twice. The sample was then passed through a 100µm nylon mesh filter before centrifuging at 4°C for 10 minutes at 790g. The supernatant was stored at <-70°C.

#### 5. Sample Processing

- Serum samples were coagulated for 30-60 minutes, centrifuged for 15 minutes at 1500g at 4°C, the serum layer removed and stored at <-70°C until analysis.
- Whole blood was stored at <-70°C and a simple salting procedure was performed for extracting DNA[12].
- The concurrent method of sputum processing was performed providing PBS and DTE supernatant for analysis[13]. Sputum samples were processed as soon as possible and within 2 hours of expectoration with 8x volume of phosphate buffered saline (PBS) and a proportion of supernatant was then removed and the sample was further incubated with 0.2% dithioerythritol (DTE) giving a final concentration of 0.1% DTE using the process described in Figure 2. Cytospins were stained using by rapid Romanowski staining (Fisher Scientific, Loughborough, UK). The proportion of inflammatory cells were assessed by counting 400 respiratory cells + squamous to give a mean percentage of respiratory cells and an independent mean percentage of squamous cells counted to indicate the level of salivary contamination.

**Figure 2: Sputum Processing**

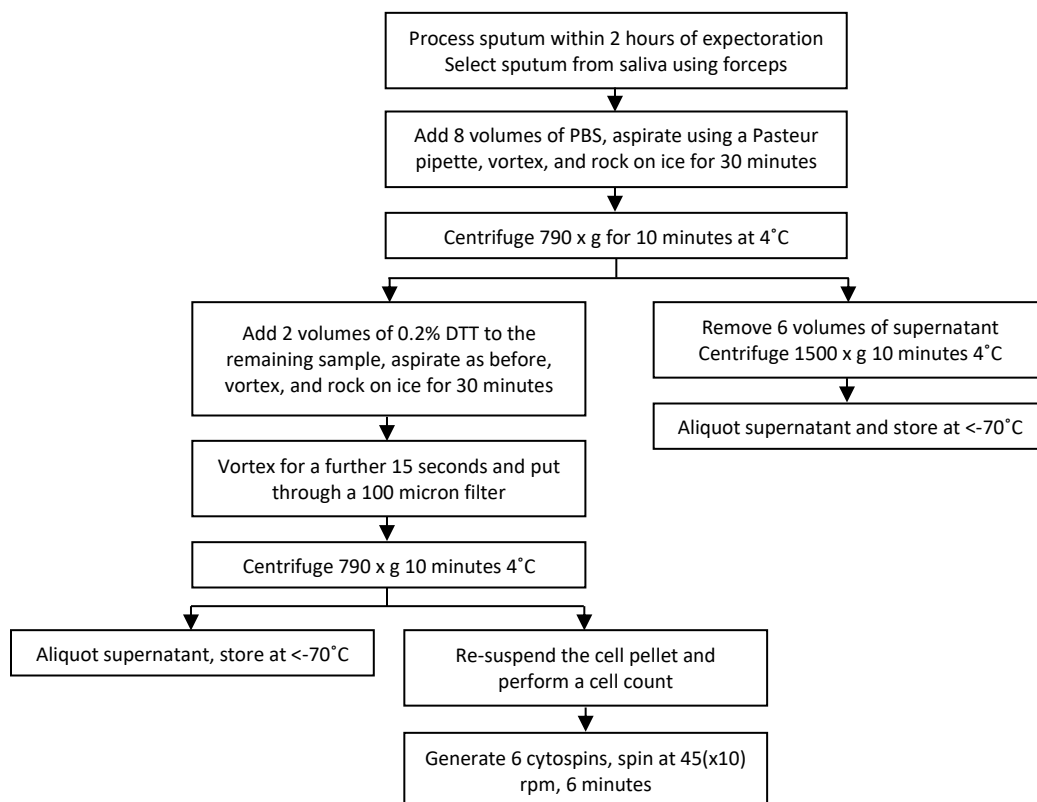

- Nasal lavage was stored on ice and processed as soon as possible and within 30 minutes of collection. A small portion was removed for bacteriology analysis and the remaining sample was filtered through a 100µm cell strainer. Samples were then centrifuged at 790 x G and stored at <-70°C until further analysis.
- Urine was aliquotted and stored as soon as possible at <-70°C until further analysis. A small portion was analysed immediately for urinary cotinine.
- Inflammatory mediators were measured by:
  - Enzyme-linked immunosorbent assays (ELISA) – myeloperoxidase, elastase (Hycult® Biotech, Uden, The Netherlands), eosinophil cationic protein (MBL® International, MA, USA), interleukin (IL)-5 (Abnova®, Taiwan), IL-6, high-sensitivity-CRP (Biomerica®, CA, USA), ENA-78, eotaxin, FGF, osteopontin, ST2/IL-1 R4, VEGF, YKL-40 (Quidel Corporation, CA, USA), periostin (K Izuhara), tryptase, and α2-macroglobulin (A Walls)
  - Fluoroenzyme immunoassay – total IgE (ImmunoCAP, Phadia®, Uppsala, Sweden)
  - Cytokine bead array (Luminex®, R&D Systems, Oxford, UK): matrix metalloproteases (MMPs), metalloproteinase inhibitor 1 (TIMP-1), G-CSF, GM-CSF, Gro-α, CCL1, ICAM-1, IFN-γ, IL-1 α, IL-1 β, IL-1RA, IL-2, IL-4, IL-8, IL-10, IL-12, IL-13, IL-17, MCP-1, MIP-1 α, MIP-1 β, TNF-α (R&D Systems, Abingdon, Oxford, UK)
- Urinary cotinine was measured by lateral flow chromatographic immunoassay NicoScreen® One Step Cotinine Test Device (Modern Health Systems Ltd, Shipley, UK).

**Table 2: Characteristics of the Wessex Severe Asthma Cohort**

|                                                                                   | Severe Asthma           | Mild-Mod Asthma         | Healthy Controls        |
|-----------------------------------------------------------------------------------|-------------------------|-------------------------|-------------------------|
| <b>Number (n)</b>                                                                 | 342                     | 69                      | 80                      |
| <b>Patient Demographics:</b>                                                      |                         |                         |                         |
| Age (y)                                                                           | 48.2±13.8               | 38.9±12.6               | 37.2±12.8               |
| Female (%)                                                                        | 67.5%                   | 58%                     | 63.8%                   |
| BMI (Kg/m <sup>2</sup> ); BMI>30 (%)                                              | 29.7 (25.6-35.6); 48.2% | 27.8 (25.2-33.3); 43.5% | 23.7 (21.9-26.9); 13.8% |
| <b>Smoking status:</b>                                                            |                         |                         |                         |
| Never smoker (%)                                                                  | 55%                     | 68%                     | 66.3%                   |
| Ex-smoker (%); Pack-years (y)                                                     | 39.2%; 10 (4.4-22.5)    | 29%; 2.5 (1.5 -8)       | 25%; 2 (1-6)            |
| Current smoker (%); Pack-years (y)                                                | 5.8%; 20 (8.4 -35)      | 3%; 1 (1-1)             | 8.8%; 5 (2.5 -7.2)      |
| <b>Asthma Characteristics:</b>                                                    |                         |                         |                         |
| Age at asthma onset (y); onset ≤12 years (%)                                      | 22±19; 40.4%            | 18±14; 50.7%            | -                       |
| Asthma duration (y)                                                               | 26±17                   | 21±14                   | -                       |
| Family history of asthma or allergy (%)                                           | 43.9%                   | 73.9%                   | 50%                     |
| <b>Asthma Treatment:</b>                                                          |                         |                         |                         |
| ICS dose (BDP equivalent µg/day)                                                  | 2369±1149               | 278±302                 | -                       |
| LABA/LTRA/LAMA/Theophylline (%)                                                   | 95.8%/67.6%/31.3%/26.2% | 29%/1.4%/0%/0%          | -                       |
| Maintenance OCS (%); Prednisolone equivalent dose (mg)                            | 34.2%; 15.9±12          | 0%; 0                   | 0%; 0                   |
| BTS Step 1/2/3/2 (%)                                                              | 0%/0%/0%                | 46.4%/26.1%/27.5%       | -                       |
| BTS Step 4/5 (%)                                                                  | 65.1%/34.9%             | 0%/0%                   | -                       |
| Omalizumab/Long-term macrolide/Antifungal                                         | 2.9%/11%/3%             | 0%/1.4%/0%              | 0%/1.3%/0%              |
| <b>Asthma Control:</b>                                                            |                         |                         |                         |
| Rescue OCS courses in previous year                                               | 2 (1-4)                 | 0 (0-0)                 | -                       |
| ≥1 Hospital admission in previous year                                            | 50.3%                   | 0%                      | -                       |
| ACQ 6; ACQ6 >1.5 (%)                                                              | 2.74±1.24; 82.5%        | 0.85±0.73; 14.5%        | 0.01±0.04; 0%           |
| Previous intensive care admission for asthma (%)                                  | 18.1%                   | 0%                      | -                       |
| <b>Co-morbidities:</b>                                                            |                         |                         |                         |
| Gastro-oesophageal reflux disease (%); PPI use (%)                                | 48.5%; 45.5%            | 8.7%; 5.8%              | 10%; 6.3%               |
| Rhinosinusitis (%); Rhinosinusitis treatment <sup>o</sup> (%)                     | 72.5%; 72.8%            | 31.9%; 4.3%             | 5%; 3.8%                |
| Nasal polyps (%)                                                                  | 14%                     | 1.4%                    | 2.5%                    |
| Aspirin sensitivity (%)                                                           | 27.7%                   | 5.9%                    | 1.3%                    |
| SNOT-20 score                                                                     | 35.5±19.4               | 15.5±11.3               | 7.2±8.2                 |
| HADS anxiety/depression                                                           | 7.3±5.2/8.6±4.3         | 3.4±3.8/3.1±3.5         | 2.7±2.6/2.7±2.5         |
| Antidepressant use (%)                                                            | 20.2%                   | 7.2%                    | 2.5%                    |
| Diabetes/OSA/Osteoporosis (%)                                                     | 7.6%/2.9%/9.6%          | 2.9%/1.4%/0%            | 2.5%/0%/0%              |
| <b>Asthma and Generic Quality of Life Questionnaires:</b>                         |                         |                         |                         |
| AQLQ                                                                              | 4.09 ± 1.26             | 6.15 ± 0.76             | 6.96 ± 0.1              |
| Short Form-36 Health Survey                                                       | 47.9 ± 20.4             | 81.0 ± 13.5             | 86.2 ± 9.7              |
| <b>Physiological Measures:</b>                                                    |                         |                         |                         |
| FEV <sub>1</sub> pre-BD (% predicted)                                             | 69.6±24.9               | 94.3±18.4               | 104.6±11.7              |
| FEV <sub>1</sub> /FVC ratio pre-BD (%)                                            | 66.9 (55-76)            | 76.1 (71.1 – 81.4)      | 82.1 (77.1-86.5)        |
| FEV <sub>1</sub> pre-BD <80% predicted and FEV <sub>1</sub> /FVC <0.7 (%)         | 66.5%                   | 20.3%                   | 1.3%                    |
| FEV <sub>1</sub> reversibility (% from baseline); ≥12% reversibility <sup>s</sup> | 13.3 (5.2-26.4); 43.3%  | 12.9 (9.4-32.9); 26.5%  | 8.6 (7.1-10.2); 0%      |
| K <sub>CO</sub> (% predicted)                                                     | 99.2±17.5               | 98.6±14.1               | 92.3±14.2               |
| <b>Atopic status:</b>                                                             |                         |                         |                         |
| Atopic* (%)                                                                       | 72.4%                   | 82.4%                   | 45.6%                   |
| Serum total IgE (IU/ml)                                                           | 91.7 (23-331)           | 104 (30-200)            | 33 (15.7-106)           |
| <b>Measures of inflammation:</b>                                                  |                         |                         |                         |
| FeNO <sub>50</sub> measured (%)                                                   | 94.7%                   | 100%                    | 100%                    |
| FeNO <sub>50</sub> (ppb); FeNO <sub>50</sub> ≥50ppb                               | 20.7(12.7-41); 20.7%    | 22 (15-41); 18.8%       | 15.1 (11-24); 8.8%      |
| Sputum induction successful (%)                                                   | 61.1%                   | 30.4%                   | 32.5%                   |
| Sputum Inflammatory Phenotype (%):                                                | Eosinophilic (≥3%)      | 41.1%                   | 28.6%                   |
|                                                                                   | Neutrophilic (≥61%)     | 35.9%                   | 0%                      |
|                                                                                   | Mixed granulocytic      | 10.5%                   | 0%                      |
|                                                                                   | Paucigranulocytic       | 32.1%                   | 71.4%                   |
| Blood Eosinophil Count (x10 <sup>9</sup> /L); ≥0.3 (%)                            | 0.2 (0.1-0.5); 49%      | 0.2 (0.1-0.4); 38.2%    | 0.1 (0.1-0.2); 18.4%    |
| Serum Periostin (ng/ml); ≥50 (%)                                                  | 67 (56-83); 85.9%       | 66.5 (54-75.5); 85.3%   | 73.5 (58-92); 92.3%     |
| Blood Neutrophil Count (x10 <sup>9</sup> /L)                                      | 5.6 (4.2-7.8)           | 3.7 (3.3-4.4)           | 3.6 (2.9-4.5)           |

|                                                                                                                                                                               |       |       |     |
|-------------------------------------------------------------------------------------------------------------------------------------------------------------------------------|-------|-------|-----|
| Type2-high phenotype <sup>†</sup>                                                                                                                                             | 56.2% | 37.7% | 25% |
| <b>ATS/ERS Severe Asthma Criteria 2014[14]</b>                                                                                                                                |       |       |     |
| GINA Step 4/5 treatment                                                                                                                                                       | 100%  | 0%    | -   |
| ACQ(6)>1.5, ≥2 OCS bursts in previous year, ≥1 hospital admission in previous year, persistent airflow limitation or deterioration in asthma control on tapering steroid dose | 100%  | 29%   | -   |

Data presented as mean±SD, median (IQR), n or %

<sup>∞</sup>Rhinosinusitis treatment includes the use of nasal corticosteroids, oral corticosteroids and oral antihistamines

<sup>§</sup> Reversibility testing performed 15-minutes after 2.5mg nebulised Salbutamol

\* Atopic defined as ≥1 positive skin prick test

<sup>†</sup> TH2-high phenotype identified by either FeNO≥50ppb, ≥3% Sputum Eosinophils, Blood Eosinophil count >0.3x10<sup>9</sup>/L

BMI (Body Mass Index), ICS (Inhaled Corticosteroids), BDP (Beclometasone Dipropionate), LABA (Long Acting Beta-2 Agonist), LTRA (Leukotriene Receptor Antagonist), LAMA (Long Acting Muscarinic Antagonist), OCS (Oral Corticosteroids), BTS (British Thoracic Society), ACQ (Asthma Control Questionnaire), PPI (Proton Pump Inhibitor), SNOT-20 (20 Question Sino-Nasal Outcome Test Score), HADS (Hospital Anxiety and Depression Score), OSA (Obstructive Sleep Apnoea), AQLQ (Asthma Quality of Life Questionnaire), Pre-BD (Pre-Bronchodilator), FeNO<sub>50</sub> (Exhaled Nitric Oxide level at 50ml/sec flow rate).

**Table 3: Comparison of WSAC with Existing Severe Asthma Cohorts/Registries**

|                                              | WSAC                 | ENFUMOSA[15] | SARP[3] | BTS[16]          | BSAR[5]         | BIOAIR[6] |
|----------------------------------------------|----------------------|--------------|---------|------------------|-----------------|-----------|
| <b>Cohort size (n)</b>                       | 342                  | 163          | 204     | 382              | 350             | 93        |
| <b>Patient Demographics:</b>                 |                      |              |         |                  |                 |           |
| Age (y)                                      | 49.4±13.6            | 42.4±12.1    | 41±13   | NA               | 55±14           | 50.0±12.5 |
| Female (%)                                   | 67.5%                | 81.6%        | 64.0%   | 63.1%            | 55%             | 58.0%     |
| BMI (Kg/m <sup>2</sup> )                     | 29.7 (25.6-35.6)     | 27±5         | NA      | 28 (24-32)       | 26 (16-43)      | 28.5±5.8  |
| <b>Smoking status:</b>                       |                      |              |         |                  |                 |           |
| Never smoker (%)                             | 55%                  | NA           | NA      | 61%              | 57%             | NA        |
| Ex-smoker (%); Pack-years (y)                | 39.2%; 10 (4.4-22.5) | NA           | NA      | 29.8%            | 31%; 15 (11-24) | NA        |
| Current smoker (%); Pack-years (y)           | 5.8%; 20 (8.4 -35)   | NA           | NA      | 5.8%             | 12%; 11 (10-15) | NA        |
| <b>Clinical Characteristics:</b>             |                      |              |         |                  |                 |           |
| Age at asthma onset (y)                      | 22 ± 19              | NA           | 16±16   | 17 (3-35)        | NA              | NA        |
| Asthma onset ≤12 years (%)                   | 40.4%                | NA           | NA      | NA               | 32%             | NA        |
| Asthma duration (y)                          | 26±17                | 20.8±2.5     | 25±14   | NA               | NA              | NA        |
| <b>Asthma medications:</b>                   |                      |              |         |                  |                 |           |
| ICS dose (BDP equivalent µg/day)             | 2000 (1600-3000)     | 1676±667     | NA      | 2000 (1000-2000) | 2000 (190-6000) | 2064±939  |
| Maintenance OCS (%)                          | 34.2%                | 32.5%        | 32%     | 41.7%            | 24%             | NA        |
| <b>Co-morbidities:</b>                       |                      |              |         |                  |                 |           |
| Aspirin sensitivity (%)                      | 27.7%                | NA           | NA      | 9.5%             | 8%              | NA        |
| Rhinosinusitis (%)                           | 72.5%                | NA           | 54%     | 36.6%            | 49%             | NA        |
| GORD (%)                                     | 48.5%                | NA           | 41%     | 41.4%            | 36%             | NA        |
| <b>Quality of Life:</b>                      |                      |              |         |                  |                 |           |
| AQLQ                                         | 4.09 ± 1.26          | NA           | NA      | NA               | 4.14 (1.2-7)    | NA        |
| <b>Disease Control:</b>                      |                      |              |         |                  |                 |           |
| Rescue OCS courses in previous year          | 2 (1 - 4)            | NA           | NA      | 4 (2-6)          | 2.03 (0-7)      | NA        |
| Hospital admissions in previous year         | 0 (0 – 1)            | NA           | NA      | 0 (0-2)          | 0.95 (0-7)      | NA        |
| ACQ6                                         | 2.74±1.24            | NA           | NA      | NA               | 2.57±1.31       | 2.03±0.96 |
| ACQ6 >1.5 (%)                                | 82.5%                | NA           | NA      | NA               | 77%             | NA        |
| <b>Physiological Measures:</b>               |                      |              |         |                  |                 |           |
| FEV1 Pre-BD (% predicted)                    | 69.6±24.9            | 71.8±23.1    | 62±22   | 65.9±23.6        | 68±21           | 70.4±20.3 |
| FEV1 <80% predicted (%)                      | 66.5%                | NA           | 78%     | NA               | 60%             | NA        |
| FEV1/FVC ratio Pre-BD (%)                    | 66.9 (55-76)         | 79.9±16.6    | 65±13   | 63.1±15.2        | 63±12           | 67±9.6    |
| FEV1 reversibility (% from baseline)         | 13.3 (5.2-26.4)      | NA           | 20±24   | NA               | 11±13           | 9.4±7.7   |
| ≥12% reversibility (%)                       | 43.3%                | NA           | 61%     | NA               | 36%             | NA        |
| K <sub>CO</sub> (% predicted)                | 99.2±17.5            | 90.6±19      | NA      | 101.5±17         | 97±20           | NA        |
| <b>Atopic status:</b>                        |                      |              |         |                  |                 |           |
| Atopic (%)                                   | 72.4%                | 58%          | 71%     | NA               | 70%             | 43%       |
| SPT Positive HDM (%)                         | 55.3%                | NA           | NA      | 71.0%            | NA              | NA        |
| SPT Positive Cat (%)                         | 34.6%                | NA           | NA      | 65.4%            | NA              | NA        |
| Serum total IgE (IU/ml)                      | 91.7 (23-331)        | 109 (85-139) | NA      | 130 (53.5-292)   | 207 (2-10000)   | NA        |
| <b>Measures of inflammation:</b>             |                      |              |         |                  |                 |           |
| FeNO measured (% of cohort)                  | 94.7%                | NA           | 66.2%   | 34.8%            | 77.4%           | NA        |
| FeNO <sub>50</sub> (ppb)                     | 20.7(12.7-41)        | NA           | 40±38   | 34.5(16-65)      | 26 (4-250)      | 46.3±59.7 |
| Sputum induction successful (%)              | 61.1%                | NA           | 60.7%   | NA               | 32.2%           | 24.6%     |
| Sputum Eosinophil Count (%)                  | 1.5 (0.3 - 8.5)      | 11±2         | NA      | 3 (0.3-11.3)     | 7 (0-92)        | 16.7±33.7 |
| Sputum Neutrophil Count (%)                  | 49.6 (26.3 – 67.3)   | 37±3         | NA      | NA               | 51 (0-99)       | 42.2±35.7 |
| <b>Sputum Inflammatory Phenotype (%):</b>    |                      |              |         |                  |                 |           |
| Eosinophilic (≥3%)                           | 41.1%                | NA           | NA      | NA               | 60.5%           | NA        |
| Neutrophilic (≥61%)                          | 35.9%                | NA           | NA      | NA               | 27.9%           | NA        |
| Mixed granulocytic                           | 10.5%                | NA           | NA      | NA               | 5.8%            | NA        |
| Paucigranulocytic                            | 32.1%                | NA           | NA      | NA               | 17.4%           | NA        |
| Blood Eosinophil Count (x10 <sup>9</sup> /L) | 0.2 (0.1-0.5)        | NA           | NA      | 0.3 (0.2-11)     | 0.24 (0-3.1)    | NA        |

Data presented as mean±SD, median (IQR), n or %; NA= data not available

BMI (Body Mass Index), ICS (Inhaled Corticosteroids), BDP (Beclomethasone Dipropionate), OCS (Oral Corticosteroids), GORD (Gastro-oesophageal Reflux Disease), AQLQ (Asthma Quality of Life Questionnaire), ACQ (Asthma Control Questionnaire), Pre-BD (Pre-Bronchodilator), SPT (Skin Prick Test), FeNO<sub>50</sub> (Exhaled Nitric Oxide level at 50ml/sec flow rate).



**Table 4: Comparison of WSAC with UBIOPRED (Severe Asthmatics)**

|                                              | Non-smokers*         |                   | Smokers and Ex-smokers* |                 |
|----------------------------------------------|----------------------|-------------------|-------------------------|-----------------|
|                                              | WSAC                 | UBIOPRED          | WSAC                    | UBIOPRED        |
| Cohort size (n)                              | 215                  | 311               | 115                     | 110             |
| Patient Demographics:                        |                      |                   |                         |                 |
| Age (y)                                      | 47.4±14.1            | 51.01±0.8         | 51.0±12.1               | 54.51±1.08      |
| Female (%)                                   | 68.9%                | 66%               | 31.1%                   | 51%             |
| BMI (Kg/m <sup>2</sup> ); BMI>30 (%)         | 31.0±8.1; 47.7%      | 29.11±6.34; 38.6% | 31.5±7.0; 51.8%         | 29.59±6.29; 40% |
| Smoking status:                              |                      |                   |                         |                 |
| Never smoker (%)                             | 83.3%                | 84.9%             | 0%                      | 0%              |
| Ex-smoker (%); Pack-years (y)                | 16.7%; 1.5 (0.9-3.0) | 2 (1-4)           | 83.5%;15.2(8.8-30)      | 17.38(10-26)    |
| Current smoker (%); Pack-years (y)           | 0%                   |                   | 16.5%; 20(8.4-35)       |                 |
| Clinical Characteristics:                    |                      |                   |                         |                 |
| Age at diagnosis (y)                         | 17 (4-32)            | 20 (7-38)         | 32 (9-43)               | 38 (20-48)      |
| Asthma onset ≤12 years (%)                   | 43.3%                | NA                | 30.4%                   | NA              |
| Asthma duration (y)                          | 27±16                | NA                | 23±18                   | NA              |
| Asthma medications:                          |                      |                   |                         |                 |
| ICS dose (BDP equivalent µg/day)             | 2000 (1600-3000)     | NA                | 2000 (1600-2800)        | NA              |
| Maintenance OCS (%)                          | 36.3%                | 45.8%             | 29.6                    | 44.7%           |
| Co-morbidities:                              |                      |                   |                         |                 |
| Rhinosinusitis (%)                           | 75.3%                | 74.0%             | 66.1%                   | 60.4%           |
| GORD (%)                                     | 47.9%                | 46.7%             | 48.7%                   | 63.6%           |
| Quality of Life:                             |                      |                   |                         |                 |
| AQLQ                                         | 4.1±1.3              | 4.48±1.16         | 4.0±1.3                 | 4.44±1.25       |
| Disease Control:                             |                      |                   |                         |                 |
| Rescue OCS courses in previous year          | 3.2±2.7              | 2.48±2.29         | 2.8±2.2                 | 2.55±2.73       |
| ACQ7                                         | 2.75±1.10            | 2.67±1.33         | 2.90±1.23               | 2.62±1.18       |
| Physiological Measures:                      |                      |                   |                         |                 |
| FEV1 Pre-BD (% predicted)                    | 71.5±25.7            | 67.5±22.1         | 65.7±22.1               | 67.2±19.3       |
| FEV1/FVC ratio Pre-BD (%)                    | 0.67±0.14            | 0.64±0.18         | 0.63±0.13               | 0.61±0.10       |
| Atopic status:                               |                      |                   |                         |                 |
| Atopic (%)                                   | 74.4%                | 78.3%             | 67.3%                   | 71.3%           |
| Serum total IgE (IU/ml)                      | 78 (20-304)          | 119.5(45-342)     | 110 (36.7-353)          | 126(63-328)     |
| Measures of inflammation:                    |                      |                   |                         |                 |
| FeNO measured (% of cohort)                  | 95.3%                | 93.2%             | 94.8%                   | 94.5%           |
| FeNO <sub>50</sub> (ppb)                     | 22.4 (13.9-47.0)     | 26.5 (16-47)      | 18.0 (11.0-36.0)        | 23.5 (12-42)    |
| Sputum induction successful (%)              | 59.1%                | 41.1%             | 67.0%                   | 48.2%           |
| Sputum Eosinophil Count (%)                  | 2.0 (0.3-11.3)       | 2.75 (0-19)       | 1.0 (0.3-6.5)           | 4.13 (1-14)     |
| Sputum Neutrophil Count (%)                  | 52.0 (26.5-67.5)     | 53.69 (34-75)     | 46.5 (25.0-64.0)        | 55.15 (35-65)   |
| Sputum Eosinophils >1.9%                     | 50.4%                | 57.81%            | 37.7%                   | 60.38%          |
| Blood Eosinophil Count (x10 <sup>9</sup> /L) | 0.3 (0.1-0.5)        | 0.2±0.3           | 0.2 (0.1-0.4)           | 0.22±0.29       |

Data presented as mean±SD or median (IQR), n or %; NA= data not available

\*Non-smokers defined as having not smoked for 12-months with <5-pack year smoking history

BMI (Body Mass Index), ICS (Inhaled Corticosteroids), BDP (Beclometasone Dipropionate), OCS (Oral Corticosteroids), GORD (Gastro-oesophageal Reflux Disease), AQLQ (Asthma Quality of Life Questionnaire), ACQ (Asthma Control Questionnaire), Pre-BD (Pre-Bronchodilator), FeNO<sub>50</sub> (Exhaled Nitric Oxide level at 50ml/sec flow rate).

**Table 5 – Wessex Severe Asthma Cohort Detailed Characterisation Protocol**

|                                  |                                                                                                                                                                                                                                                                                                                                                                                                                                                                                                                                                                                                                                                                                                                                                                                                  |
|----------------------------------|--------------------------------------------------------------------------------------------------------------------------------------------------------------------------------------------------------------------------------------------------------------------------------------------------------------------------------------------------------------------------------------------------------------------------------------------------------------------------------------------------------------------------------------------------------------------------------------------------------------------------------------------------------------------------------------------------------------------------------------------------------------------------------------------------|
| <b>Demographics</b>              | <ul style="list-style-type: none"> <li>• Age (yrs)</li> <li>• Gender</li> <li>• Predominant Race (Caucasian/Asian/Black/Other)</li> <li>• Smoking history (pack year history if ever smoked)</li> <li>• Height</li> <li>• Weight</li> <li>• BMI</li> </ul>                                                                                                                                                                                                                                                                                                                                                                                                                                                                                                                                       |
| <b>Clinical Characteristics</b>  | <p><b>Asthma History:</b></p> <ul style="list-style-type: none"> <li>• Age at diagnosis (yrs)</li> <li>• Predominant symptoms (Wheeze/Chest tightness/Breathlessness/Cough/Other)</li> <li>• Triggers (Cold air/Exercise/Climate/ Air pollution/Fumes/Allergens/Medications including aspirin sensitivity/Emotion/Hormonal/Foods/Workplace/Alcohol/Viral RTI/Other)</li> <li>• Family history of asthma</li> <li>• Asthma treatments (BTS Stage/ICS Dose/Controller Medications/Anti-IgE)</li> <li>• Exacerbation history</li> </ul> <p><b>Medical History:</b></p> <ul style="list-style-type: none"> <li>• Medical&amp; surgical co-morbidity including rhino-sinusitis / gastro-oesophageal reflux / depression</li> <li>• Current treatments</li> </ul>                                      |
| <b>Questionnaires</b>            | <p><b>Disease Control:</b></p> <ul style="list-style-type: none"> <li>• Asthma Control Questionnaire 7</li> <li>• Asthma Control Diary</li> </ul> <p><b>General Quality of Life:</b></p> <ul style="list-style-type: none"> <li>• Short Form 36 Health Survey</li> </ul> <p><b>Asthma Specific Quality of Life:</b></p> <ul style="list-style-type: none"> <li>• Asthma Quality of Life Questionnaire (Symptoms / Activity / Emotional / Environmental / Total)</li> </ul> <p><b>Rhino-sinusitis Assessment:</b></p> <ul style="list-style-type: none"> <li>• Sino-nasal Outcome Test (20)</li> </ul> <p><b>Anxiety and Depression Assessment:</b></p> <ul style="list-style-type: none"> <li>• Hospital Anxiety and Depression Score (Anxiety / Depression / Total)</li> </ul>                  |
| <b>Physiological Measures</b>    | <ul style="list-style-type: none"> <li>• Random oscillometry pre and post-bronchodilator (R4-16 / R0 / I / FN)</li> <li>• Impulse oscillometry pre and post-bronchodilator (Z at 5Hz / R at 20 Hz / R at 5 Hz / X at 5Hz / AX / Resonant Frequency)</li> <li>• Spirometry pre and post-bronchodilator (FEV<sub>1</sub> / FVC / FEV<sub>1</sub>/FVC Ratio / MEF 75 / MEF 50 / MEF25 / PEF) with % reversibility derived from this.</li> <li>• Carbon monoxide transfer factor (Vinsp / V Asb / TLco / Kco)</li> <li>• 2-week PEF diary</li> </ul>                                                                                                                                                                                                                                                 |
| <b>Measures of Atopic Status</b> | <ul style="list-style-type: none"> <li>• Allergy history (Perennial or seasonal allergy / Food allergy / Drug allergy / Antihistamine use)</li> <li>• Skin prick testing(Aspergillus fumigatus / Alternaria tenuis / Grass pollen / Birch / Rape / Dermatophagoides pteronyssinus / Dermatophagoides farinae / Dog / Cat)</li> <li>• Serum total IgE</li> </ul>                                                                                                                                                                                                                                                                                                                                                                                                                                  |
| <b>Biological Measures</b>       | <ul style="list-style-type: none"> <li>• Exhaled Nitric Oxide (FeNO) at 50ml/sec low rate (ppb)</li> <li>• Nasal Nitric Oxide Measurements</li> </ul> <p><b>Nasal Lavage:</b></p> <ul style="list-style-type: none"> <li>• Tryptase (ng/ml)</li> <li>• Eosinophilic Cationic Protein (ng/ml)</li> <li>• Myeloperoxidase (ng/ml)</li> <li>• α-2 macroglobulin (ng/ml)</li> </ul> <p><b>Serum:</b></p> <ul style="list-style-type: none"> <li>• Periostin level</li> <li>• Staphylococcus aureus enterotoxin IgE</li> <li>• Peripheral blood eosinophil &amp; neutrophil count (x10<sup>9</sup>/L)</li> <li>• High-sensitivity C-Reactive Protein (mg/L)</li> <li>• Eosinophilic Cationic Protein (ng/ml)</li> <li>• IL-6 (pg/ml)</li> <li>• ST2/IL-1R4(pg/ml)</li> <li>• YKL-40(ng/ml)</li> </ul> |

|                             |                                                                                                                                                                                                                                                                                                                                                                                                                                                                                                                                                                                                                                                                                                                                                                                                                                                                                                                                                                                                                                                                                                                                                                                                                                                                                                                                                                                                                                                                                                                                                                                                                                                                                                                                                                                                                                                                                                                                                                                                                                                                                                                                                                                   |
|-----------------------------|-----------------------------------------------------------------------------------------------------------------------------------------------------------------------------------------------------------------------------------------------------------------------------------------------------------------------------------------------------------------------------------------------------------------------------------------------------------------------------------------------------------------------------------------------------------------------------------------------------------------------------------------------------------------------------------------------------------------------------------------------------------------------------------------------------------------------------------------------------------------------------------------------------------------------------------------------------------------------------------------------------------------------------------------------------------------------------------------------------------------------------------------------------------------------------------------------------------------------------------------------------------------------------------------------------------------------------------------------------------------------------------------------------------------------------------------------------------------------------------------------------------------------------------------------------------------------------------------------------------------------------------------------------------------------------------------------------------------------------------------------------------------------------------------------------------------------------------------------------------------------------------------------------------------------------------------------------------------------------------------------------------------------------------------------------------------------------------------------------------------------------------------------------------------------------------|
|                             | <p><b>Induced Sputum:</b></p> <ul style="list-style-type: none"> <li>• Inflammatory Cell Counts (Macrophages / Neutrophils / Eosinophils / Lymphocytes / Epithelial Cells / Squamous Cells)</li> <li>• IL-10(pg/ml)</li> <li>• IL-5(pg/ml)</li> <li>• IL-4 (pg/ml)</li> <li>• IL-1receptor antagonist(pg/ml)</li> <li>• IL-1<math>\alpha</math> (pg/ml)</li> <li>• IL-1 <math>\beta</math> (pg/ml)</li> <li>• Granulocyte Macrophage Colony-Stimulating Factor (pg/ml)</li> <li>• Vascular Endothelial Growth Factor (pg/ml)</li> <li>• IL-17 (pg/ml)</li> <li>• Monocyte Chemotactic Protein 1/CCL2 (pg/ml)</li> <li>• Tumour Necrosis Factor-<math>\alpha</math> (pg/ml)</li> <li>• Macrophage Inflammatory Protein 1<math>\beta</math>/CCL4 (pg/ml)</li> <li>• Fibroblast Growth Factor (pg/ml)</li> <li>• Granulocyte Colony-Stimulating Factor (pg/ml)</li> <li>• Interferon-<math>\gamma</math> (pg/ml)</li> <li>• IL-2 (pg/ml)</li> <li>• Macrophage Inflammatory Protein 1<math>\alpha</math>/CCL3(pg/ml)</li> <li>• Eotaxin (pg/ml)</li> <li>• TIMP MetalloproteinaseInhibitor 1(ng/ml)</li> <li>• Matrix metalloproteinase-1 (pg/ml)</li> <li>• Matrix metalloproteinase-2 (pg/ml)</li> <li>• Matrix metalloproteinase-3 (pg/ml)</li> <li>• Matrix metalloproteinase-7 (pg/ml)</li> <li>• Matrix metalloproteinase-8 (pg/ml)</li> <li>• Matrix metalloproteinase-9 (pg/ml)</li> <li>• Matrix metalloproteinase-12 (pg/ml)</li> <li>• Matrix metalloproteinase-13 (pg/ml)</li> <li>• IL-6 (pg/ml) (PBS &amp; DTE)</li> <li>• IL-6 Soluble Receptor (pg/ml)</li> <li>• Tryptase(ng/ml) (DTE)</li> <li>• Eosinophilic Cationic Protein (ng/ml) (DTE)</li> <li>• Myeloperoxidase (ng/ml) (DTE)</li> <li>• YKL-40 (ng/ml) (DTE)</li> <li>• Osteopontin(pg/ml)</li> <li>• CXCL5/ENA-78 (pg/ml)</li> <li>• IL-8 (pg/ml) (DTE)</li> <li>• CXCL1/Gro-<math>\alpha</math> (pg/ml) (DTE)</li> <li>• <math>\alpha</math>-2 macroglobulin (ng/ml) (DTE)</li> <li>• Elastase (ng/ml)</li> <li>• IL-13 (pg/ml)</li> </ul> <p><b>Urine:</b></p> <ul style="list-style-type: none"> <li>• Urinary eosinophil-derived neurotoxin/protein X (mg/ml)</li> <li>• Urinary Cotinine</li> </ul> |
| <b>Additional Measures:</b> | <ul style="list-style-type: none"> <li>• University of Pennsylvania Smell Identification Test</li> <li>• HRCT Chest</li> </ul>                                                                                                                                                                                                                                                                                                                                                                                                                                                                                                                                                                                                                                                                                                                                                                                                                                                                                                                                                                                                                                                                                                                                                                                                                                                                                                                                                                                                                                                                                                                                                                                                                                                                                                                                                                                                                                                                                                                                                                                                                                                    |

**Table 6: Summary of Trial Eligibility Criteria (Phase IIb/III RCTs of Novel Therapies in Severe Asthma since 2000)**

| Target       | Drug         | Authors              | Year              | Phase | Trial Number          | N              | Eligibility Criteria |     |                     |               |                        |                |               |         |                     |
|--------------|--------------|----------------------|-------------------|-------|-----------------------|----------------|----------------------|-----|---------------------|---------------|------------------------|----------------|---------------|---------|---------------------|
|              |              |                      |                   |       |                       |                | Steroid Dose         |     | Airflow Obstruction | Reversibility | Exacerbation Frequency | Asthma Control | BMI or Weight | Smoking | Biomarker criterion |
|              |              |                      |                   |       |                       |                | ICS                  | OCS |                     |               |                        |                |               |         |                     |
| IgE          | Omalizumab   | Holgate et al[17]    | 2004              | III   | x                     | 246            | •                    |     | •                   | •             |                        |                |               | •       | •                   |
|              |              | Humbert et al[18]    | 2005              | II    | x                     | 419            | •                    | •   | •                   | •             | •                      |                |               | •       | •                   |
|              |              | Hanania et al[19]    | 2011              | III   | NCT00314575           | 850            | •                    |     | •                   | §             | •                      |                | •             | •       | •                   |
| IL-5         | Mepolizumab  | Haldar et al[20]     | 2009              | II    | ISRCTN75169762        | 61             | •                    |     | •                   | §             | •                      |                |               | •       | •                   |
|              |              | Nair et al[21]       | 2009              | II    | NCT00292877           | 20             | •                    | •   | •                   |               |                        |                | §             | •       |                     |
|              |              | Pavord et al[22]     | 2012              | III   | NCT01000506           | 621            | •                    |     | •                   | §             | •                      |                | •             | •       | §                   |
|              |              | Bel et al[23]        | 2014              | III   | NCT01691508           | 135            | •                    | •   | •                   | §             |                        |                | •             | •       | •                   |
|              |              | Ortega et al[24]     | 2014              | III   | NCT01691521           | 576            | •                    |     | •                   | §             | •                      |                | •             | •       | •                   |
|              |              | Chupp et al[25]      | 2017              | III   | NCT02281318           | 556            | •                    |     | •                   | §             | •                      |                |               | •       | •                   |
|              |              | Castro et al[26]     | 2011              | II    | x                     | 106            | •                    | •   | •                   | §             |                        | •              |               | •       | •                   |
|              | Reslizumab   | Castro et al[27]     | 2015              | III   | NCT01287039           | 489            | •                    | •   |                     | •             | •                      | •              |               | •       | •                   |
|              |              | Castro et al[27]     | 2015              | III   | NCT01285323           | 464            | •                    | •   |                     | •             | •                      | •              |               | •       | •                   |
|              |              | Bjerner et al[28]    | 2016              | III   | NCT01270464           | 315            | •                    |     |                     | •             |                        | •              |               | •       | •                   |
|              |              | Corren et al[29]     | 2016              | III   | NCT01508936           |                | •                    | •   |                     | •             |                        | •              |               | •       |                     |
|              |              | Bleecker et al[30]   | 2016              | III   | NCT01928771           | 1205           | •                    |     | •                   | •             | •                      | •              | •             | •       |                     |
|              | Benralizumab | FitzGerald et al[31] | 2016              | III   | NCT01914757           | 1306           | •                    |     | •                   | •             | •                      | •              | •             | •       |                     |
|              |              |                      |                   |       |                       |                |                      |     |                     |               |                        |                |               |         |                     |
| IL-13        | Tralokinumab | Piper et al[32]      | 2013              | II    | NCT00873860           | 194            |                      | •   | •                   | §             | •                      | •              | •             | •       |                     |
|              |              | Brightling et al[33] | 2015              | II    | NCT01402986           | 452            | •                    |     | §                   | §             | •                      | §              | •             | •       |                     |
|              | Lebrikizumab | Corren et al[34]     | 2011              | II    | NCT00930163           | 219            | •                    | •   | •                   | •             |                        | •              | •             | •       |                     |
|              |              | Hanania et al[35]    | 2016              | III   | NCT01867125           | 1081           | •                    | •   | •                   | •             |                        | •              |               | •       |                     |
|              |              | Hanania et al[35]    | 2016              | III   | NCT01868061           | 1068           | •                    | •   | •                   | •             |                        | •              |               | •       |                     |
|              | GSK679586    | De Boever et al[36]  | 2014              | II    | NCT00843193           | 198            | •                    |     | •                   | •             |                        | •              |               | •       |                     |
| IL-4Rα       | AMG317       | Corren et al[37]     | 2010              | II    | NCT00436670           | 294            | •                    | •   | •                   | •             |                        | •              |               | •       | •                   |
|              | Dupilumab    | Wenzel et al[38]     | 2013              | II    | NCT01312961           | 104            | •                    | •   | •                   | •             | •                      | •              |               | •       | §                   |
|              |              | Wenzel et al[39]     | 2016              | II    | NCT01854047           | 769            | •                    | •   | •                   | •             | •                      | •              |               | •       |                     |
|              | Pitrakinra   | Slager et al[40]     | 2012              | II    | NCT00801853           | 534            | •                    | •   | •                   | §             | •                      | •              |               | •       |                     |
| IL-4/5       | Suplatast    | Tamaoki et al[41]    | 2000              | II    | x                     | 85             | •                    | •   | •                   | •             |                        |                |               | •       |                     |
| DP2 receptor | Fevipirant   | Gonem et al[42]      | 2016              | II    | NCT01545726           | 61             |                      | •   |                     | §             | •                      | •              |               | •       | •                   |
| IL-2Rα       | Daclizumab   | Busse et al[43]      | 2008              | II    | NCT00028288           | 115            | •                    | •   | •                   | •             |                        |                |               | •       | •                   |
| TSLP         | Tezepelumab  | Corren et al[44]     | 2017              | II    | NCT02054130           | 584            | •                    | •   | •                   | •             | •                      | •              | •             | •       |                     |
| c-kit/PDGF   | Masitinib    | Humbert et al[45]    | 2009              | II    | NCT00842270           | 44             | •                    | •   |                     | •             |                        |                |               | •       | •                   |
| CXCR2        | Navarixin    | Nair et al[46]       | 2012              | II    | NCT00632502           | 34             | •                    |     | •                   | §             |                        |                |               | •       | •                   |
|              | AZD5069      | O'Byrne et al[47]    | 2016              | II    | NCT01704495           | 640            | •                    |     | •                   |               | •                      |                |               | •       | •                   |
| IL17RA       | Brodalumab   | Busse et al[48]      | 2013              | II    | NCT01199289           | 302            | •                    | •   | •                   | •             |                        | •              |               |         |                     |
| TNFα         | Entanercept  | Morjaria et al[49]   | 2008              | II    | x                     | 39             | •                    |     |                     | §             |                        |                |               | •       |                     |
|              |              | Holgate et al[50]    | 2011              | II    | NCT00141791           | 132            | •                    | •   | •                   | •             |                        | •              |               | •       |                     |
|              | Golimumab    | Wenzel et al[51]     | 2009              | II    | NCT00207740           | 309            | •                    |     |                     | §             | •                      | •              |               | •       |                     |
| Multiple     | BT           | Castro et al[52]     | 2010              | III   | NCT00231114           | 288            | •                    | •   | •                   |               | •                      |                |               | •       |                     |
|              |              | Brusselle et al[53]  | 2013              | III   | NCT00760838           | 109            | •                    |     |                     | §             | •                      |                |               | •       | •                   |
|              | Azithromycin | Gibson et al[54]     | 2017              | III   | AZNCTR126090001 97235 | 420            | •                    |     |                     | §             |                        |                |               | •       |                     |
|              |              | TLA                  | Storror et al[55] | 2017  | III                   | ISRCTN46346208 | 222                  | •   |                     |               | §                      | •              | •             |         | •                   |

• Criteria used; § Composite criteria used

**Table 7: Summary of Trial Eligibility (Phase IIb/III RCTs of Novel Therapies in Severe Asthma since 2000)**

| Drug         | Authors              | Year | Phase | Meet Eligibility Criteria (%) |        |                     |               |                        |                |        |         |                    | Eligible (%)    |         |
|--------------|----------------------|------|-------|-------------------------------|--------|---------------------|---------------|------------------------|----------------|--------|---------|--------------------|-----------------|---------|
|              |                      |      |       | Steroid Dose                  |        | Airflow Obstruction | Reversibility | Exacerbation Frequency | Asthma Control | BMI    | Smoking | Biomarker criteria | Asthma Criteria | Overall |
|              |                      |      |       | ICS                           | OCS    |                     |               |                        |                |        |         |                    |                 |         |
| Omalizumab   | Holgate et al[17]    | 2004 | III   | 69.6%                         | 100.0% | 54.4%               | 38.9%         | 100.0%                 | 100.0%         | 100.0% | 67.3%   | 36.8%              | 12.6%           | 3.5%    |
|              | Humbert et al[18]    | 2005 | II    | 93.9%                         | 92.7%  | 54.4%               | 43.3%         | 79.5%                  | 100.0%         | 100.0% | 67.3%   | 36.8%              | 11.7%           | 4.1%    |
|              | Hanania et al[19]    | 2011 | III   | 69.6%                         | 100.0% | 54.4%               | 81.9%         | 100.0%                 | 100.0%         | 98.8%  | 67.3%   | 36.8%              | 18.4%           | 6.1%    |
| Mepolizumab  | Haldar et al[20]     | 2009 | II    | 85.1%                         | 100.0% | 66.7%               | 81.6%         | 74.0%                  | 100.0%         | 100.0% | 72.8%   | 25.2%              | 23.1%           | 7.9%    |
|              | Nair et al[21]       | 2009 | II    | 85.7%                         | 34.2%  | 87.7%               | 100.0%        | 100.0%                 | 100.0%         | 100.0% | 82.7%   | 25.2%              | 23.1%           | 5.6%    |
|              | Pavord et al[22]     | 2012 | III   | 72.2%                         | 100.0% | 66.7%               | 100.0%        | 74.0%                  | 100.0%         | 99.7%  | 67.3%   | 57.3%              | 23.1%           | 17.5%   |
|              | Bel et al[23]        | 2014 | III   | 72.2%                         | 28.9%  | 66.7%               | 100.0%        | 100.0%                 | 100.0%         | 99.7%  | 68.7%   | 69.6%              | 8.8%            | 4.1%    |
|              | Ortega et al[24]     | 2014 | III   | 72.2%                         | 100.0% | 66.7%               | 100.0%        | 74.0%                  | 100.0%         | 99.7%  | 68.7%   | 69.6%              | 24.0%           | 15.8%   |
|              | Chupp et al[25]      | 2017 | III   | 72.2%                         | 100.0% | 66.7%               | 100.0%        | 74.0%                  | 100.0%         | 100.0% | 67.3%   | 69.6%              | 23.4%           | 14.9%   |
|              |                      |      |       |                               |        |                     |               |                        |                |        |         |                    |                 |         |
| Reslizumab   | Castro et al[26]     | 2011 | II    | 72.2%                         | 65.8%  | 76.3%               | 86.3%         | 100.0%                 | 86.5%          | 100.0% | 83.3%   | 25.2%              | 22.8%           | 4.7%    |
|              | Castro et al[27]     | 2015 | III   | 93.9%                         | 84.2%  | 100.0%              | 43.3%         | 100.0%                 | 86.0%          | 100.0% | 83.3%   | 45.3%              | 23.7%           | 8.8%    |
|              | Castro et al[27]     | 2015 | III   | 93.9%                         | 84.2%  | 100.0%              | 43.3%         | 100.0%                 | 86.0%          | 100.0% | 83.3%   | 45.3%              | 23.7%           | 8.8%    |
|              | Bjermer et al[28]    | 2016 | III   | 93.9%                         | 100.0% | 100.0%              | 43.3%         | 100.0%                 | 86.0%          | 100.0% | 83.3%   | 45.3%              | 29.2%           | 10.8%   |
|              | Corren et al[29]     | 2016 | III   | 93.9%                         | 65.8%  | 100.0%              | 43.3%         | 100.0%                 | 86.5%          | 100.0% | 83.3%   | 100%               | 15.5%           | 15.5%   |
| Benralizumab | Bleecker et al[30]   | 2016 | III   | 93.9%                         | 100.0% | 66.7%               | 38.9%         | 74.0%                  | 86.5%          | 99.7%  | 67.3%   | 100%               | 11.1%           | 11.1%   |
|              | FitzGerald et al[31] | 2016 | III   | 93.9%                         | 100.0% | 66.7%               | 38.9%         | 74.0%                  | 86.5%          | 99.7%  | 67.3%   | 100%               | 11.1%           | 11.1%   |
| Tralokinumab | Piper et al[32]      | 2013 | II    | 100.0%                        | 84.2%  | 87.7%               | 81.9%         | 100.0%                 | 86.5%          | 86.3%  | 67.3%   | 100%               | 26.9%           | 26.9%   |
|              | Brightling et al[33] | 2015 | II    | 93.9%                         | 100.0% | 54.4%               | 81.9%         | 63.2%                  | 86.5%          | 86.8%  | 68.7%   | 100%               | 11.4%           | 11.4%   |
| Lebrikizumab | Corren et al[34]     | 2011 | II    | 59.6%                         | 65.8%  | 54.4%               | 43.3%         | 100.0%                 | 86.5%          | 98.5%  | 68.7%   | 100%               | 6.1%            | 6.1%    |
|              | Hanania et al[35]    | 2016 | III   | 89.5%                         | 65.8%  | 54.4%               | 43.3%         | 100.0%                 | 86.5%          | 100.0% | 68.7%   | 100%               | 7.6%            | 7.6%    |
|              | Hanania et al[35]    | 2016 | III   | 89.5%                         | 65.8%  | 54.4%               | 43.3%         | 100.0%                 | 86.5%          | 100.0% | 68.7%   | 100%               | 7.6%            | 7.6%    |
| GSK679586    | De Boever et al[36]  | 2014 | II    | 93.9%                         | 100.0% | 58.2%               | 43.3%         | 100.0%                 | 86.0%          | 100.0% | 70.5%   | 100%               | 18.4%           | 18.4%   |
| AMG317       | Corren et al[37]     | 2010 | II    | 59.6%                         | 65.8%  | 43.0%               | 43.3%         | 100.0%                 | 86.5%          | 100.0% | 67.3%   | 73.7%              | 3.8%            | 3.5%    |
| Dupilumab    | Wenzel et al[38]     | 2013 | II    | 93.9%                         | 65.8%  | 43.0%               | 38.9%         | 100.0%                 | 47.7%          | 100.0% | 68.7%   | 36.6%              | 2.9%            | 2.1%    |
|              | Wenzel et al[39]     | 2016 | II    | 93.9%                         | 84.2%  | 54.4%               | 38.9%         | 100.0%                 | 86.5%          | 100.0% | 68.7%   | 100%               | 10.5%           | 10.5%   |
| Pitrakinra   | Slager et al[40]     | 2012 | II    | 93.9%                         | 65.8%  | 61.4%               | 81.9%         | 100.0%                 | 100.0%         | 100.0% | 67.3%   | 100%               | 23.4%           | 23.4%   |
| Suplatast    | Tamaoki et al[41]    | 2000 | II    | 83.6%                         | 65.8%  | 62.6%               | 34.5%         | 100.0%                 | 100.0%         | 100.0% | 83.3%   | 100%               | 6.4%            | 6.4%    |
| Fevipirant   | Gonem et al[42]      | 2016 | II    | 100.0%                        | 84.2%  | 100.0%              | 100.0%        | 100.0%                 | 86.0%          | 100.0% | 83.3%   | 27.2%              | 59.7%           | 16.7%   |
| Daclizumab   | Busse et al[43]      | 2008 | II    | 93.9%                         | 65.8%  | 43.0%               | 43.3%         | 100.0%                 | 100.0%         | 100.0% | 67.3%   | 73.7%              | 6.7%            | 5.3%    |
| Tezepelumab  | Corren et al[44]     | 2017 | II    | 99.4%                         | 84.2%  | 54.4%               | 38.9%         | 79.5%                  | 86.5%          | 86.3%  | 67.3%   | 100%               | 6.4%            | 6.4%    |
| Masitinib    | Humbert et al[45]    | 2009 | II    | 93.9%                         | 22.5%  | 100.0%              | 43.3%         | 100.0%                 | 100.0%         | 100.0% | 67.3%   | 99.1%              | 5.6%            | 5.3%    |
| Navarixin    | Nair et al[46]       | 2012 | II    | 93.9%                         | 100.0% | 93.6%               | 81.9%         | 100.0%                 | 100.0%         | 100.0% | 74.0%   | 36.8%              | 55.6%           | 19.9%   |
| AZD5069      | O'Byrne et al[47]    | 2016 | II    | 93.9%                         | 100.0% | 67.8%               | 100.0%        | 79.5%                  | 100.0%         | 100.0% | 74.0%   | 71.9%              | 37.7%           | 25.2%   |
| Brodalumab   | Busse et al[48]      | 2013 | II    | 59.6%                         | 65.8%  | 43.0%               | 43.3%         | 100.0%                 | 86.5%          | 100.0% | 100.0%  | 100%               | 6.7%            | 6.7%    |
| Entanercept  | Morjaria et al[49]   | 2008 | II    | 69.6%                         | 100.0% | 100.0%              | 86.3%         | 100.0%                 | 100.0%         | 100.0% | 67.3%   | 100%               | 39.5%           | 39.5%   |
|              | Holgate et al[50]    | 2011 | II    | 93.9%                         | 84.5%  | 43.0%               | 51.8%         | 100.0%                 | 74.6%          | 100.0% | 67.3%   | 100%               | 8.2%            | 8.2%    |
| Golimumab    | Wenzel et al[51]     | 2009 | II    | 93.9%                         | 100.0% | 100.0%              | 86.3%         | 74.0%                  | 74.6%          | 100.0% | 67.3%   | 100%               | 30.7%           | 30.7%   |
| BT           | Castro et al[52]     | 2010 | III   | 93.9%                         | 84.2%  | 62.6%               | 100.0%        | 68.4%                  | 100.0%         | 100.0% | 67.3%   | 100%               | 26.3%           | 26.3%   |
| Azithromycin | Brusselle et al[53]  | 2013 | III   | 69.6%                         | 100.0% | 100.0%              | 86.3%         | 74.0%                  | 100.0%         | 100.0% | 67.3%   | 74.0%              | 31.6%           | 20.8%   |
|              | Gibson et al[54]     | 2017 | III   | 99.4%                         | 100.0% | 100.0%              | 100.0%        | 100.0%                 | 100.0%         | 100.0% | 81.0%   | 100%               | 76.9%           | 76.9%   |
| TLA          | Storror et al[55]    | 2017 | III   | 93.9%                         | 100.0% | 100.0%              | 100.0%        | 74.0%                  | 94.7%          | 100.0% | 72.8%   | 73.7%              | 53.8%           | 41.5%   |

Figure 3: Trial Eligibility for Phase III IL-5 Targeted Treatments in Severe Eosinophilic Asthmatics Defined by Varying Levels of Sputum or Blood Eosinophilia

Blood Eosinophil Count  $\geq 300$  Cells/ $\mu$ L - 21.1%(median; range 13.4% - 26.8%)

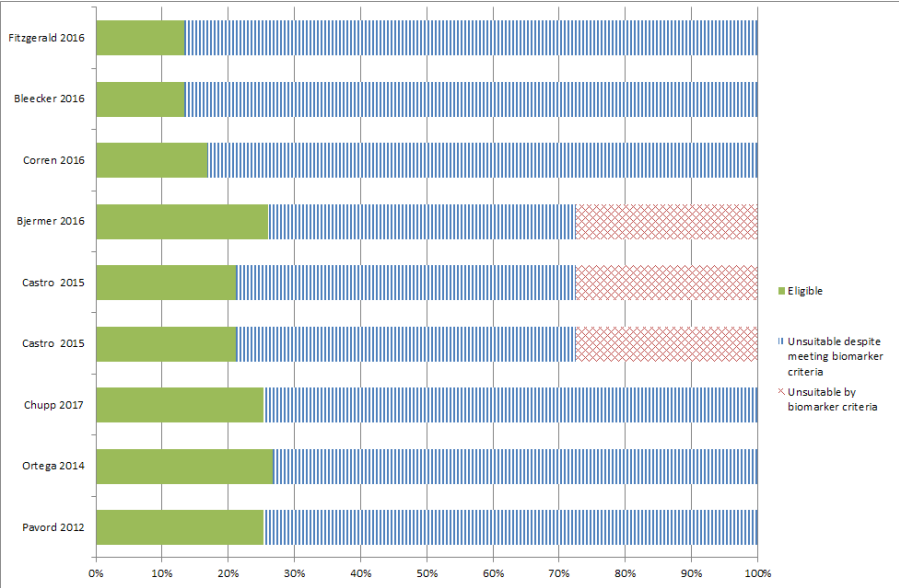

Blood Eosinophil Count  $\geq 150$  Cells/ $\mu$ L - 17.7% (median; range 11.3%-20.4%)

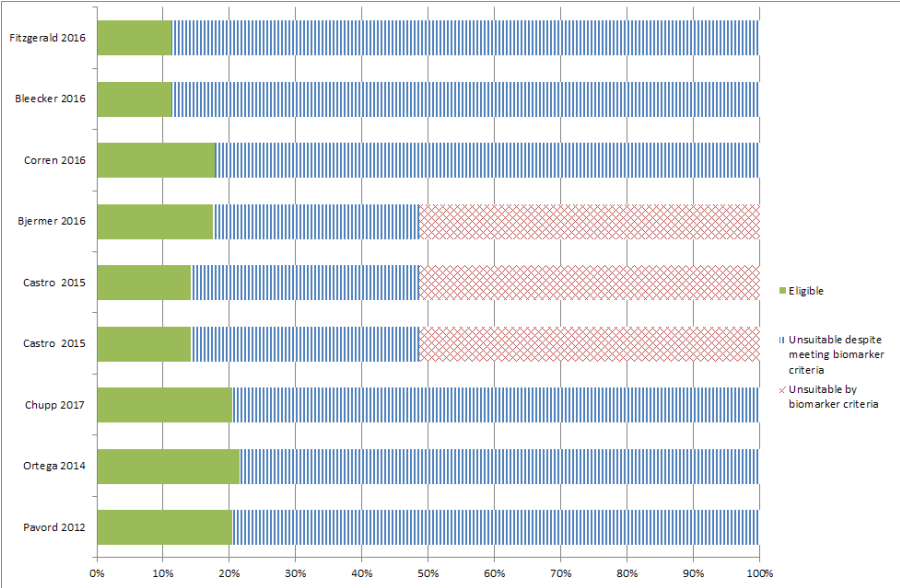

Sputum Eosinophil  $\geq 3\%$  - 16.3% (median; range 14.0% - 26.7%)

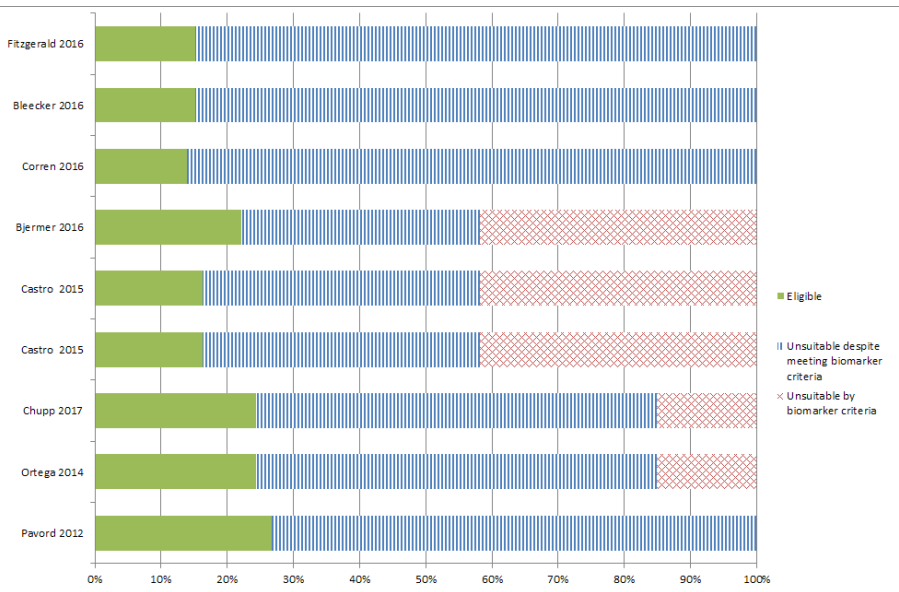

Sputum Eosinophil  $\geq 2\%$  - 16.1% (median; range 12.9% - 25.8%)

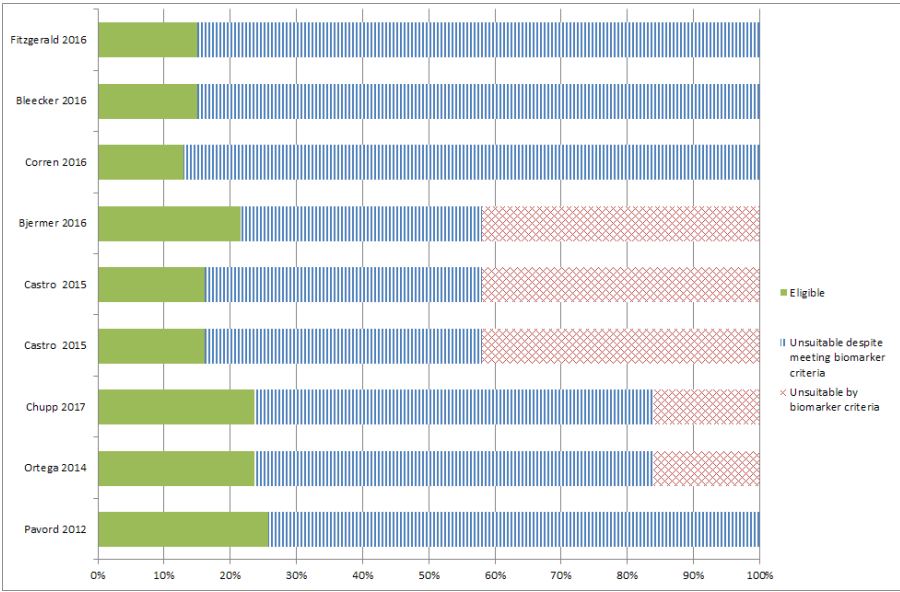

**Table 8: NICE Eligibility Criteria for Biological Therapies Licensed for use in Severe Asthma**

| <b>Mepolizumab</b> ( <i>NICE TA431; Jan 2017</i> )                                     | <b>Reslizumab</b> ( <i>NICE TA479; Oct 2017</i> )                  |
|----------------------------------------------------------------------------------------|--------------------------------------------------------------------|
| Severe refractory eosinophilic asthma                                                  |                                                                    |
| Blood eosinophil count $\geq 300$ cells/ $\mu$ L in last 12 months                     | Blood eosinophil count $\geq 400$ cells/ $\mu$ L in last 12 months |
| $\geq 4$ severe exacerbations in last 12-months or maintenance oral corticosteroids    | $\geq 3$ severe exacerbations in last 12-months                    |
| Adherence confirmed, treatment optimised, co-morbidities and asthma triggers addressed |                                                                    |

## References:

1. Reddel HK, Taylor DR, Bateman ED, Boulet LP, Boushey HA, Busse WW, Casale TB, Chanez P, Enright PL, Gibson PG, De Jongste JC, Kerstjens HAM, Lazarus SC, Levy ML, O'Byrne PM, Partridge MR, Pavord ID, Sears MR, Sterk PJ, Stoloff SW, Sullivan SD, Szeffler SJ, Thomas MD, Wenzel SE. An official American Thoracic Society/European Respiratory Society statement: Asthma control and exacerbations - Standardizing endpoints for clinical asthma trials and clinical practice. *Am. J. Respir. Crit. Care Med.* 2009; .
2. British Thoracic Society/Scottish Intercollegiate Guidelines Network National Guideline on the Management of Asthma. 2009.
3. Moore WC, Bleecker ER, Curran-Everett D, Erzurum SC, Ameredes BT, Bacharier L, Calhoun WJ, Castro M, Chung KF, Clark MP, Dweik RA, Fitzpatrick AM, Gaston B, Hew M, Hussain I, Jarjour NN, Israel E, Levy BD, Murphy JR, Peters SP, Teague WG, Meyers DA, Busse WW, Wenzel SE. Characterization of the severe asthma phenotype by the National Heart, Lung, and Blood Institute's Severe Asthma Research Program. *J. Allergy Clin. Immunol.* 2007; 119: 405–413.
4. Shaw DE, Sousa AR, Fowler SJ, Fleming LJ, Roberts G, Corfield J, Pandis I, Bansal AT, Bel EH, Auffray C, Compton CH, Bisgaard H, Bucchioni E, Caruso M, Chanez P, Dahlén B, Dahlen SE, Dyson K, Frey U, Geiser T, De Verdier MG, Gibeon D, Guo YK, Hashimoto S, Hedlin G, Jeyasingham E, Hekking PPW, Higenbottam T, Horváth I, Knox AJ, et al. Clinical and inflammatory characteristics of the European U-BIOPRED adult severe asthma cohort. *Eur. Respir. J.* 2015; 46: 1308–1321.
5. Schleich F, Brusselle G, Louis R, Vandenplas O, Michils A, Pilette C, Peche R, Manise M, Joos G. Heterogeneity of phenotypes in severe asthmatics. The Belgian Severe Asthma Registry (BSAR). *Respir. Med.* 2014; .
6. Kupczyk M, Haque S, Sterk PJ, Nizankowska-Mogilnicka E, Papi A, Bel EH, Chanez P, Dahlén B, Gaga M, Gjomarkaj M, Howarth PH, Johnston SL, Joos GF, Kanniess F, Tzortzaki E, James A, Middelveld RJM, Dahlén SE. Detection of exacerbations in asthma based on electronic diary data: Results from the 1-year prospective BIOAIR study. *Thorax* 2013; .
7. Miller MR, Hankinson J, Brusasco V, Burgos F, Casaburi R, Coates A, Crapo R, Enright P, Grinten CPM Van Der, Gustafsson P, Jensen R, Johnson DC, Macintyre N, McKay R, Navajas D, Pedersen OF, Pellegrino R, Viegi G, Wanger J. Standardisation of spirometry. 2005; 26: 319–338.
8. MacIntyre N, Crapo RO, Viegi G, Johnson DC, van der Grinten CPM, Brusasco V, Burgos F, Casaburi R, Coates A, Enright P, Gustafsson P, Hankinson J, Jensen R, McKay R, Miller MR, Navajas D, Pedersen OF, Pellegrino R, Wanger J. Standardisation of the single-breath determination of carbon monoxide uptake in the lung. *Eur. Respir. J.* 2005.
9. Oostveen E, MacLeod D, Lorino H, Farre R, Hantos Z, Desager K, Marchal F. The forced oscillation technique in clinical practice: methodology, recommendations and future developments. *Eur. Respir. J.* 2003; .
10. Recommendations for Standardized Procedures for the Online and Offline Measurement of Exhaled Lower Respiratory Nitric Oxide and Nasal Nitric Oxide in Adults and Children—1999. *Am J Respir Crit Care Med* 1999; 160: 2104–2117.
11. Ten Brinke A, De Lange C, Zwinderman AH, Rabe KF, Sterk PJ, Bel EH. Sputum induction in severe asthma by a standardized protocol: Predictors of excessive bronchoconstriction. *Am. J. Respir. Crit. Care Med.* 2001; 164: 749–753.
12. Miller SA, Dykes DD, Polesky HF. A simple salting out procedure for extracting DNA from human nucleated cells. *Nucleic Acids Res.* 1988; 16: 1215.
13. Bafadhel M, McCormick M, Saha S, McKenna S, Shelley M, Hargadon B, Mistry V, Reid C, Parker D, Dodson P, Jenkins M, Lloyd A, Rugman P, Newbold P, Brightling CE. Profiling of sputum inflammatory mediators in asthma and chronic obstructive pulmonary disease. *Respiration* 2012; .
14. Chung KF, Wenzel SE, Brozek JL, Bush A, Castro M, Sterk PJ, Adcock IM, Bateman ED, Bel EH, Bleecker ER, Boulet L-P, Brightling C, Chanez P, Dahlen S-E, Chung KF. International ERS/ATS guidelines on definition, evaluation and treatment of severe asthma. *Eur Respir J* 2014; 43: 343–373.
15. The ENFUMOSA cross-sectional European multicentre study of the clinical phenotype of chronic severe asthma. *Eur. Respir. J.* 2003; .
16. Heaney LG, Brightling CE, Menzies-Gow A, Stevenson M, Niven RM. Refractory asthma in the UK: Cross-sectional findings from a UK multicentre registry. *Thorax* 2010; .
17. Holgate ST, Chuchalinw AG, Heertz J, Lö J, Perssonz GB, Chungk KF, Bousquet J, Kerstjensww HA, Foxzz H, Thirlwellzz J, Della Cioppazz G. Efficacy and safety of a recombinant anti-immunoglobulin E antibody (omalizumab) in severe allergic asthma. *Clin Exp Allergy* 2004; 34: 632–638.
18. Humbert M, Beasley R, Ayres J, Slavin R, Hébert J, Bousquet J, Beeh K, Ramos S, Canonica G, Hedgcock S, Fox H, Blogg M, Surrey K. Benefits of omalizumab as add-on therapy in patients with severe persistent asthma who are inadequately controlled despite best available therapy (GINA 2002 step 4 treatment): INNOVATE. *Allergy* 2005; 60: 309–316.
19. Hanania NA, Alpan O, Hamilos DL, Condemi JJ, Reyes-Rivera I, Zhu J, Rosen KE, Eisner MD, Wong DA, Busse W. Omalizumab in Severe Allergic Asthma Inadequately Controlled With Standard Therapy. *Ann. Intern. Med.* 2011; 154: 573–582.
20. Haldar P, Brightling CE, Hargadon B, Gupta S, Monteiro W, Sousa A, Marshall RP, Bradding P, Green RH, Wardlaw AJ, Pavord ID. Mepolizumab and Exacerbations of Refractory Eosinophilic Asthma. *N Engl J Med* 2009; 360: 973–984.
21. Nair P, Pizzichini MMM, Kjarsgaard M, Inman MD, Efthimiadis A, Pizzichini E, Hargreave FE, O'byrne PM. Mepolizumab for Prednisone-Dependent Asthma with Sputum Eosinophilia. 2009; 10.
22. Pavord ID, Korn S, Howarth P, Bleecker ER, Buhl R, Keene ON, Ortega H, Chanez P. Mepolizumab for severe eosinophilic



- asthma (DREAM): a multicentre, double-blind, placebo-controlled trial. *Lancet* 2012; 380: 651–659.
23. Bel EH, Wenzel SE, Thompson PJ, Prazma CM, Keene ON, Yancey SW, Ortega HG, Pavord ID. Oral Glucocorticoid-Sparing Effect of Mepolizumab in Eosinophilic Asthma. *N Engl J Med* 2014; 371:13.
24. Ortega HG, Liu MC, Pavord ID, Brusselle GG, FitzGerald JM, Chetta A, Humbert M, Katz LE, Keene ON, Yancey SW, Chanez P. Mepolizumab Treatment in Patients with Severe Eosinophilic Asthma. *N. Engl. J. Med.* 2014; .
25. Geoffrey L Chupp, Eric S Bradford, Frank C Albers, Daniel J Bratton, Jie Wang-Jairaj, Linda M Nelsen, Jennifer L Trevor, Antoine Magnan, Anneke ten Brinke. Efficacy of mepolizumab add-on therapy on health-related quality of life and markers of asthma control in severe eosinophilic asthma (MUSCA): a randomised, double-blind, placebo-controlled, parallel-group, multicentre, phase 3b trial. *Lancet Respir Med* 2017; 5: 390–400.
26. Castro M, Mathur S, Hargreave F, Boulet LP, Xie F, Young J, Jeffrey Wilkins H, Henkel T, Nair P. Reslizumab for poorly controlled, eosinophilic asthma: A randomized, placebo-controlled study. *Am. J. Respir. Crit. Care Med.* 2011; 184: 1125–1132.
27. Castro M, Zangrilli J, Wechsler ME, Bateman ED, Brusselle GG, Bardin P, Murphy K, Maspero JF, O'Brien C, Korn S. Reslizumab for inadequately controlled asthma with elevated blood eosinophil counts: Results from two multicentre, parallel, double-blind, randomised, placebo-controlled, phase 3 trials. *Lancet Respir. Med.* 2015; .
28. Bjermer L, Lemiere C, Maspero J, Weiss S, Zangrilli J, Germinaro M. Reslizumab for Inadequately Controlled Asthma With Elevated Blood Eosinophil Levels: A Randomized Phase 3 Study. *Chest* 2016; 150: 789–798.
29. Corren J, Weinstein S, Janka L, Zangrilli J, Garin M. Phase 3 Study of Reslizumab in Patients With Poorly Controlled Asthma: Effects Across a Broad Range of Eosinophil Counts. *Chest* 2016; 150: 799–810.
30. Bleecker ER, FitzGerald JM, Chanez P, Papi A, Weinstein SF, Barker P, Sproule S, Gilmartin G, Aurivillius M, Werkström V, Goldman M. Efficacy and safety of benralizumab for patients with severe asthma uncontrolled with high-dosage inhaled corticosteroids and long-acting  $\beta_2$ -agonists (SIROCCO): a randomised, multicentre, placebo-controlled phase 3 trial. *Lancet* 2016; 388: 2115–2127.
31. FitzGerald JM, Bleecker ER, Nair P, Korn S, Ohta K, Lommatzsch M, Ferguson GT, Busse WW, Barker P, Sproule S, Gilmartin G, Werkström V, Aurivillius M, Goldman M. Benralizumab, an anti-interleukin-5 receptor  $\alpha$  monoclonal antibody, as add-on treatment for patients with severe, uncontrolled, eosinophilic asthma (CALIMA): a randomised, double-blind, placebo-controlled phase 3 trial. *Lancet* 2016; .
32. Piper E, Brightling C, Niven R, Oh C, Faggioni R, Poon K, She D, Kell C, May RD, Geba GP, Molino NA. A phase II placebo-controlled study of tralokinumab in moderate-to-severe asthma. *Eur. Respir. J.* 2013; .
33. Brightling CE, Chanez P, Leigh R, O'Byrne PM, Korn S, She D, May RD, Streicher K, Ranade K, Piper E. Efficacy and safety of tralokinumab in patients with severe uncontrolled asthma: A randomised, double-blind, placebo-controlled, phase 2b trial. *Lancet Respir. Med.* 2015; .
34. Corren J, Lemanske RF, Hanania NA, Korenblat PE, Parsey M V., Arron JR, Harris JM, Scheerens H, Wu LC, Su Z, Mosesova S, Eisner MD, Bohen SP, Matthews JG. Lebrikizumab Treatment in Adults with Asthma. *N. Engl. J. Med.* 2011; .
35. Hanania NA, Korenblat P, Chapman KR, Bateman ED, Kopecky P, Paggiaro P, Yokoyama A, Olsson J, Gray S, Holweg CTJ, Eisner M, Asare C, Fischer SK, Peng K, Putnam WS, Matthews JG. Efficacy and safety of lebrikizumab in patients with uncontrolled asthma (LAVOLTA I and LAVOLTA II): replicate, phase 3, randomised, double-blind, placebo-controlled trials. *Lancet Respir. Med.* 2016; .
36. De Boever EH, Ashman C, Cahn AP, Bs M, Locantore NW, Overend P, Pouliquen IJ, Serone AP, Wright TJ, Jenkins MM, Panesar IS, Thiagarajah SS, Chb M, Wenzel SE. Efficacy and safety of an anti-IL-13 mAb in patients with severe asthma: A randomized trial. *J. Allergy Clin. Immunol.* 2014; 133: 989–996.e4.
37. Corren J, Busse W, Meltzer EO, Mansfield L, Bensch G, Fahrenholz J, Wenzel SE, Chon Y, Dunn M, Weng HH, Lin SL. A randomized, controlled, phase 2 study of AMG 317, an IL-4R $\alpha$  antagonist, in patients with asthma. *Am. J. Respir. Crit. Care Med.* 2010; 181: 788–796.
38. Wenzel S, Ford L, Pearlman D, Spector S, Sher L, Skobieranda F, Wang L, Kirkesseli S, Rocklin R, Bock B, Hamilton J, Ming JE, Radin A, Stahl N, Yancopoulos GD, Graham N, Pirozzi G. Dupilumab in persistent asthma with elevated eosinophil levels. *N. Engl. J. Med.* 2013; 368: 2455–2466.
39. Wenzel S, Castro M, Corren J, Maspero J, Wang L, Zhang B, Pirozzi G, Sutherland ER, Evans RR, Joish VN, Eckert L, Graham NMH, Stahl N, Yancopoulos GD, Louis-Tisserand M, Teper A. Dupilumab efficacy and safety in adults with uncontrolled persistent asthma despite use of medium-to-high-dose inhaled corticosteroids plus a long-acting  $\beta_2$  agonist: a randomised double-blind placebo-controlled pivotal phase 2b dose-ranging trial. *Lancet* 2016; 388: 31–44.
40. Slager RE, Otulana BA, Hawkins GA, Yen YP, Peters SP, Wenzel SE, Meyers DA, Bleecker ER. IL-4 receptor polymorphisms predict reduction in asthma exacerbations during response to an anti-IL-4 receptor  $\alpha$  antagonist. *J. Allergy Clin. Immunol.* 2012; 130: 516–522.e4.
41. Tamaoki J, Kondo M, Sakai N, Aoshiba K, Tagaya E, Nakata J, Isono K, Nagai A. Effect of suplatast tosilate, a Th2 cytokine inhibitor, on steroid-dependent asthma: a double-blind randomised study. *Lancet* 2000; 356: 273–278.
42. Gonem S, Berair R, Singapuri A, Hartley R, Laurencin MFM, Bacher G, Holzhauer B, Bourne M, Mistry V, Pavord ID, Mansur AH, Wardlaw AJ, Siddiqui SH, Kay RA, Brightling CE. Fevipiprant, a prostaglandin D2receptor 2 antagonist, in patients with persistent eosinophilic asthma: a single-centre, randomised, double-blind, parallel-group, placebo-controlled trial. *Lancet Respir. Med.* 2016; 4: 699–707.
43. Busse WW, Israel E, Nelson HS, Baker JW, Charous BL, Young DY, Vexler V, Shames RS, Baker J, Bensch G, Berger W, Berkowitz R, Brazinsky S, Busse W, Charous BL, Chervinsky P, Corren J, Craig T, Goldberg P, Gross G, Israel E, Kaiser H,

- Kirn K, Korenblat P, Lisberg E, Liu M, Nayak A, Nelson H, Pedinoff A, Weakley S. Daclizumab improves asthma control in patients with moderate to severe persistent asthma: A randomized, controlled trial. *Am. J. Respir. Crit. Care Med.* 2008; 178: 1002–1008.
44. Corren J, Parnes JR, Wang L, Mo M, Roseti SL, Griffiths JM, van der Merwe R. Tezepelumab in Adults with Uncontrolled Asthma. *N. Engl. J. Med.* 2017; 377: 936–946.
  45. Humbert M, de Blay F, Garcia G, Prud'homme A, Leroyer C, Magnan A, Tunon-de-Lara J-M, Pison C, Aubier M, Charpin D, Vachier I, Purohit A, Gineste P, Bader T, Moussy A, Hermine O, Chanez P. Masitinib, a c-kit/PDGF receptor tyrosine kinase inhibitor, improves disease control in severe corticosteroid-dependent asthmatics. *Allergy* 2009; 64: 1194–1201.
  46. Nair P, Gaga M, Zervas E, Alagha K, Hargreave FE, O'byrne PM, Stryszak P, Gann L, Sadeh J, Chanez P, Nair P. Safety and efficacy of a CXCR2 antagonist in patients with severe asthma and sputum neutrophils: a randomized, placebo-controlled clinical trial. *Clin. Exp. Allergy* 2012; 42: 1097–1103.
  47. O'Byrne PM, Metev H, Puu M, Richter K, Keen C, Uddin M, Larsson B, Cullberg M, Nair P. Efficacy and safety of a CXCR2 antagonist, AZD5069, in patients with uncontrolled persistent asthma: a randomised, double-blind, placebo-controlled trial. *Lancet Respir. Med.* 2016; .
  48. Busse WW, Holgate S, Kerwin E, Chon Y, Feng J, Lin J, Lin S-L. Randomized, Double-Blind, Placebo-controlled Study of Brodalumab, a Human Anti-IL-17 Receptor Monoclonal Antibody, in Moderate to Severe Asthma. *Am J Respir Crit Care Med* 2013; 188: 1294–1302.
  49. Morjaria JB, Chauhan AJ, Babu KS, Polosa R, Davies DE, Holgate ST. The role of a soluble TNF $\alpha$  receptor fusion protein (etanercept) in corticosteroid refractory asthma: a double blind, randomised, placebo controlled trial. *Thorax* 2008; 63: 584–591.
  50. Holgate ST, Noonan M, Chanez P, Busse W, Dupont L, Pavord I, Hakulinen A, Paolozzi L, Wajdula J, Zang C, Nelson H, Raible D. Efficacy and safety of etanercept in moderate-to-severe asthma: A randomised, controlled trial. *Eur. Respir. J.* 2011; 37: 1352–1359.
  51. Wenzel SE, Barnes PJ, Bleecker ER, Bousquet J, Busse W, Dahlén S-E, Holgate ST, Meyers DA, Rabe KF, Antczak A, Baker J, Horvath I. A Randomized, Double-blind, Placebo-controlled Study of Tumor Necrosis Factor- $\alpha$  Blockade in Severe Persistent Asthma. *Am J Respir Crit Care Med* 2009; 179: 549–558.
  52. Castro M, Rubin AS, Laviolette M, Fiterman J, Lima MDA, Shah PL, Fiss E, Olivenstein R, Thomson NC, Niven RM, Pavord ID, Simoff M, Duhamel DR, McEvoy C, Barbers R, Ten Hacken NHT, Wechsler ME, Holmes M, Phillips MJ, Erzurum S, Lunn W, Israel E, Jarjour N, Kraft M, Shargill NS, Quiring J, Berry SM, Cox G. Effectiveness and safety of bronchial thermoplasty in the treatment of severe asthma: A multicenter, randomized, double-blind, sham-controlled clinical trial. *Am. J. Respir. Crit. Care Med.* 2010; 181: 116–124.
  53. Brusselle GG, VanderStichele C, Jordens P, Deman R, Slabbynck H. Azithromycin for prevention of exacerbations in severe asthma (AZISAST): a multicentre randomised double-blind placebo-controlled trial. *Thorax* 2013; 68: 322–329.
  54. Gibson PG, Yang IA, Upham JW, Reynolds PN, Hodge S, James AL, Jenkins C, Peters MJ, Marks GB, Baraket M, Powell H, Taylor SL, Leong LEX, Rogers GB, Simpson JL. Effect of azithromycin on asthma exacerbations and quality of life in adults with persistent uncontrolled asthma (AMAZES): a randomised, double-blind, placebo-controlled trial. *Lancet* 2017; 390: 659–668.
  55. Storrar W, Fogg C, Brown T, Dennison P, Yu LM, Dewey A, Luengo-Fernandez R, Dean T, Rahman N, Mansur A, Howarth PH, Bradding P, Chauhan AJ. Temperature-controlled laminar airflow in severe asthma for exacerbation reduction (The LASER Trial): Study protocol for a randomised controlled trial. *Trials* 2016; 17.
